# Supplementary material for: On the Optimal Whole-Body Vibration Protocol for Muscle Strength
Source: MDPI journal article supplement (doi:10.3390/biomechanics2040043), 2022-10-19
Supplement: s1 [file s1]

Table S1: Summary of clinical studies of effects of WBV on muscles in healthy young adults (18 to 32 years of age)

| Reference          | Frequency (Hz) | Amplitude (mm)       | Posture during WBV                   | Dosage/session and vibration sessions/week                                                           | Results                                                                                           |
|--------------------|----------------|----------------------|--------------------------------------|------------------------------------------------------------------------------------------------------|---------------------------------------------------------------------------------------------------|
| Chen et al. [65]   | 5, 10, 15      | 2                    | N/A                                  | 60 seconds of training, 3 repetitions.                                                               | Highest sEMG activity in lumbar-abdominal muscles at 15 Hz.                                       |
| Dallas et al. [34] | 30             | 2.5 (peak to peak).  | Eccentric and concentric squatting   | 3 days/week for 6 weeks.                                                                             | Improvement in jump performance and leg strength.                                                 |
| Morel et al. [76]  | 50             | 1.53                 | Squat at 50° knee flexion angle.     | 5 test sets, each of 30–60 seconds followed by 30 seconds rest.                                      | Greater EMG signal at Flexor Digitorum Superficialis (FD) muscle than Wrist Extensor (ED) muscle. |
| Dallas et al. [33] | 30             | 2.5 (peak to peak).  | N/A                                  | 120 seconds to 240 seconds/session. 3 days/week for 8 weeks.                                         | Improved balance and jump performance.                                                            |
| Stania et al. [70] | 20, 40, 60     | 2, 4 (peak to peak). | Knee and hip joints bent at 90°.     | 1 minute of vibration, 1minute break, 5 repetitions. 3 sessions/week for 4 weeks.                    | 60 Hz, 4 mm provides higher peak average torque.                                                  |
| Chung et al. [77]  | 3, 18, 32      | 1, 3, 114            | 90°–150°                             | 60 seconds followed by 2 minutes of rest. 3 sessions/week for 8 weeks.                               | Higher isometric and isokinetic contraction strength at high frequency and low amplitude.         |
| Annino et al. [36] | 35             | 5                    | N/A                                  | 60 seconds of training followed by 60 seconds of rest, 5 repetitions. 2 sets separated by 5 minutes. | Reduced EMG activity in agonist muscle (Biceps Femoris). Increased antagonist/agonist ratio.      |
| Yang et al. [65]   | 35, 45         | 2 (peak to peak).    | Squatting at 60° knee flexion angle. | 4 minutes.                                                                                           | Increased jump height in both groups.                                                             |

|                          |                           |                            |                                                     |                                                                                                     |                                                                                                            |
|--------------------------|---------------------------|----------------------------|-----------------------------------------------------|-----------------------------------------------------------------------------------------------------|------------------------------------------------------------------------------------------------------------|
| Harwood et al. [78]      | 25, 35, 45                | 2                          | Isometric squat at 60° knee flexion angle.          | 1 minute of vibration followed by 1 minute of rest, 5 repetitions.                                  | Increased muscle activity, decreased H-reflex/M-wave ratio, about the same for all frequencies.            |
| Ezmaeilzadeh et al. [14] | 30, 50                    | 2–4 (peak to peak).        | Semi-squat position, one-legged squat position.     | 20–60 minutes/session, 30–45 seconds/dose and 30–45 seconds of rest. 3 sessions/week for 8 weeks.   | Peak torque for 30 Hz group is higher than 50 Hz group.                                                    |
| Bush et al. [19]         | 30                        | 4 (peak to peak).          | Dynamic and static squats; 100° knee flexion angle. | 30 seconds/dose followed by 60 seconds of rest. 5 minutes of WBV with 10 repetitions.               | WBV with dynamic squat can potentiate neuromuscular functioning at 30 Hz - 4 mm vibration.                 |
| Marin et al. [20]        | 30, 50                    | 1.15, 2.51 (peak to peak). | Single leg static squat; 60° knee flexion angle.    | 30 seconds of WBV; rest time varies with tests.                                                     | 50 Hz & 2.51 mm enhanced sEMG activity more than 30 Hz & 1.15 mm.                                          |
| Ritzmann et al. [12]     | 5, 10, 15, 20, 25, and 30 | 4                          | 5°, 30°, and 60° knee flexion angles.               | 10 seconds of WBV, 30 seconds of rest.                                                              | EMG activity was highest during side-alternating vibration of 30 Hz at 60° knee flexion angle.             |
| Krol et al. [67]         | 20, 40, 60                | 2, 4                       | 90° knee flexion angle.                             | 30 seconds of WBV and 2 minutes of rest. In total, 8 trials.                                        | EMG(rms) activity was maximum at 60 Hz - 4 mm.                                                             |
| Pollock et al. [64]      | 30                        | 2.5, 5.5                   | 15.1° knee flexion angle.                           | 7 seconds of WBV followed by 30 seconds of rest.                                                    | Linear increase of EMG activity with amplitude and frequency except at Biceps Femoris and Gluteus Maximus. |
| Petit et al. [59]        | 30, 50                    | 2, 4 (peak to peak)        | Knee angle of 70°, 80°, and 90°                     | 30 seconds of WBV, followed by 30 seconds of rest, 10 minutes/session. 3 sessions/week for 6 weeks. | Increased knee extensor muscle strength at high frequency and high peak to peak amplitude.                 |
| Abercromby et al. [9]    | 30                        | 4                          | Dynamic squat; 5° - 40° knee flexion angle.         | Each trial < 15 seconds, cumulative WBV for each subject.                                           | Increased EMG values in muscles during rotational (R) and vertical (V) vibration.                          |

Table S2: Summary of clinical studies of effects of WBV on muscle in elderly adults (54-82 years of age).

| Reference              | Frequency (Hz) | Amplitude (mm)                                  | Posture during WBV            | Dosage/ session and vibration sessions/week                                              | Results                                                                                                                                                      |
|------------------------|----------------|-------------------------------------------------|-------------------------------|------------------------------------------------------------------------------------------|--------------------------------------------------------------------------------------------------------------------------------------------------------------|
| Wei and Ng [40]        | 40             | 4 (peak to peak).                               | 60° knee flexion angle.       | 90 seconds per set, 4 sets per day. 36 training sessions, 3 sessions/week for 12 weeks.  | WBV facilitates the central motor drive in elderly people with sarcopenia.                                                                                   |
| Miller et al. [47]     | 30             | 4                                               | 30° knee flexion angle.       | Continuous WBV: 6 minutes/set; Intermittent WBV: six 1-minute/dose and 1 minute rest.    | Intermittent WBV has better outcomes in performance tests (jump height, grip strength, timed up and go test, sit and reach test) than continuous WBV.        |
| Goudarzian et al. [42] | 30–35          | 5–8 (peak to peak).                             | Squatting at 120° knee angle. | 30 minutes/session. 3 times/week for 8 weeks.                                            | Improved performance among all performance tests (timed-up and go, 5-repetition chair raising, 10-m walking, and leg isometric tests) after WBV.             |
| Wei et al. [58]        | 20, 40, 60     | 4 (peak to peak).                               | 60° knee flexion angle.       | 240 seconds and 720 seconds /dose; 5 minutes of rest time. 3 sessions/week for 12 weeks. | 40 Hz-360 s is more effective in performance tests (timed-up-and-go, 10-meter walking, five repetition sit-to-stand tests) than 20 Hz-720 s and 60 Hz-240 s. |
| Smith et al. [45]      | 30             | 1 (for the first 2 weeks) and 2 (for the rest). | N/A                           | 1-minute WBV followed by 1 minute of rest for 5 minutes. 2 sessions/week for 12 weeks.   | Improved muscle strength, static and dynamic balance.                                                                                                        |

|                         |                                                             |                                                           |                                              |                                                                                     |                                                                                                                            |
|-------------------------|-------------------------------------------------------------|-----------------------------------------------------------|----------------------------------------------|-------------------------------------------------------------------------------------|----------------------------------------------------------------------------------------------------------------------------|
| Perchthaler et al. [31] | 30                                                          | 3.9                                                       | knee angle of 45°–60°.                       | 12 training sessions for 6 weeks.                                                   | Increase in multi-joint strength, but no change in isokinetic muscle strength, power.                                      |
| Osugi et al. [79]       | 20                                                          | N/A                                                       | 45°–60° knee flexion angle.                  | 4 minutes/session. 2 sessions/week for 6 months.                                    | WBV along with squat training is more beneficial than WBV alone to balance and muscle power.                               |
| Cristi et al. [44]      | Training frequency gradually increases from 30 Hz to 45 Hz. | 2 (peak to peak).                                         | 30° and 60° knee flexion angle during squat. | 30–60 seconds. 3 sessions/week for 9 weeks.                                         | Significant increase in maximal voluntary contraction.                                                                     |
| Perchthaler et al. [66] | 6, 12, 18, 24, and 30.                                      | 1.3, 2.6, and 3.9.                                        | Knee angles of 30°, 45°, and 60°.            | 15 seconds of vibration followed by 60 seconds of rest.                             | Highest muscle activity (% of maximal voluntary contraction) was found at 30 Hz – 3.9 mm WBV with 60° knee angle position. |
| Machado et al. [71]     | Training frequency gradually increases from 20 Hz to 40 Hz. | Training amplitude gradually increases from 2 mm to 4 mm. | Knee angle of 90°–130°.                      | 30–60 seconds/dose followed by 2–3 minutes of rest. 3–5 sessions/week for 10 weeks. | Significant increase in muscle cross-sectional area and muscle strength.                                                   |
| Rees et al. [80]        | 26                                                          | 5–8 (peak to peak).                                       | Squat at 100° knee flexion angle.            | 45 seconds–80 seconds/session; total of 6 sets. 3 sessions per week for 8 weeks.    | Increased planter-flexor strength.                                                                                         |

Table S3: Summary of clinical studies on the effects of vibration on muscle with postures other than standing

| Study                     | Location of vibration source | Posture during WBV                                                           | Frequency (Hz) | Amplitude (mm) | Dosage/ session and vibration sessions/week                                                     | Results                                                                                                                               |
|---------------------------|------------------------------|------------------------------------------------------------------------------|----------------|----------------|-------------------------------------------------------------------------------------------------|---------------------------------------------------------------------------------------------------------------------------------------|
| Pujari et al. [49]        | Feet                         | Sitting with 90° knee flexion angle.                                         | 30, 50         | 0.5, 1.5       | 5 interventions/session with 5 minutes of rest. Single session.                                 | Greater sEMG activity at 50 Hz-0.5mm.                                                                                                 |
| Yung et al. [81]          | Feet                         | Physically demanding, mentally demanding, and concurrent work.               | 5.91           | N/A            | 30 minutes of WBV/session, 4 sessions/day for 4 days.                                           | Impairment to visual-motor skills, increased bodily discomfort, reduced postural sway, increase in muscle fatigue, and low-back pain. |
| Osawa and Oguma 2011 [82] | Lower extremity, trunk.      | 8 exercises in prone and supine positions during vibration.                  | 35             | 2              | 60 minutes/session, 2 sessions/week for 7 weeks.                                                | Improved maximal isometric and concentric knee extension strength, maximal isometric lumbar extension strength after WBV.             |
| Osawa et al. [48]         | Lower extremity, trunk.      | 8 body-weight exercises in semi-prone and supine positions during vibration. | 30–40          | 2              | 30 seconds/set followed by 60 seconds of rest, 40 minutes/session, 2 sessions/week for 7 weeks. | Vibration along with bodyweight exercises have no impact on muscle power.                                                             |

|                            |      |                                         |                          |          |                                                                                      |                                                                                                                         |
|----------------------------|------|-----------------------------------------|--------------------------|----------|--------------------------------------------------------------------------------------|-------------------------------------------------------------------------------------------------------------------------|
| Blottner<br>et al.<br>[83] | Feet | Supine position during bed rest.        | 19–25                    | N/A      | Two bouts (6 minutes each) per day, 89<br>exercise sessions within 56 days.          | Unchanged size of<br>the myofiber type I<br>and II for Vastus<br>Lateralis. The size<br>increased for<br>soleus muscle. |
| Park et<br>al. [53]        | Hand | Seated position with the armrest.       | 40, 80, 100,<br>120, 150 | 0.2, 0.3 | 45 seconds of vibration followed by 2<br>minutes of rest. Total 36 trials in 2 days. | Frequencies within<br>100 Hz-150 Hz<br>produced higher<br>Tonic Vibration<br>Reflex (TVR).                              |
| Hansson<br>et al.<br>[46]  | Hip  | Seated with forwarding bent<br>posture. | 5                        | N/A      | 5 minutes/set.                                                                       | Development of<br>muscle fatigue.                                                                                       |

Table S4. Summary of studies on the adverse effects of WBV.

| Study                 | Frequency and acceleration                                                                                               | Duration                                      | Posture                            | Effects                                                                                                                               |
|-----------------------|--------------------------------------------------------------------------------------------------------------------------|-----------------------------------------------|------------------------------------|---------------------------------------------------------------------------------------------------------------------------------------|
| Yung et al. [81]      | 5.91 Hz.                                                                                                                 | 30 minutes of WBV.                            | Sitting and standing.              | Impairment to visual-motor skills, increased bodily discomfort, reduced postural sway, increase in muscle fatigue, and low-back pain. |
| Azizan et al. [84]    | 1–15 Hz (random vibration), acceleration 0.2 m/s <sup>2</sup> .                                                          | 20 minutes.                                   | Sitting.                           | Drowsiness and impaired psychomotor performance.                                                                                      |
| Beard et al. [85]     | 0.025 Hz – 1 Hz (horizontal vibration).                                                                                  | N/A                                           | Sitting with and without backrest. | Increased discomfort without backrest.                                                                                                |
| Azizan et al. [86]    | 1 Hz –15 Hz, acceleration 0.3 m/s <sup>2</sup> .                                                                         | 20 minutes                                    | Sitting.                           | A decrease in beta wave resulted in greater drowsiness.                                                                               |
| Basri et al. [87]     | 20 Hz and 0.2 m/s <sup>2</sup> – 2 m/s <sup>2</sup> ; 8 Hz and acceleration 0.4 m/s <sup>2</sup> .                       | Less than 45 minutes per session, 5 sessions. | Sitting with inclined backrest.    | Increased discomfort.                                                                                                                 |
| Butler et al. [88]    | 0.1 Hz (transverse and pitch); acceleration 1.26 m/s <sup>2</sup> .                                                      | Single session (30 minutes).                  | Sitting.                           | Motion sickness is caused by combined fore-and-aft and pitch oscillation.                                                             |
| Satou et al. [89]     | 10 Hz , acceleration 0.6 m/s <sup>2</sup> .                                                                              | 12 minutes.                                   | Sitting.                           | Reduction in wakefulness level.                                                                                                       |
| Joseph et al. [90]    | 0.2 Hz (transverse and roll); acceleration 1.26 m/s <sup>2</sup> .                                                       | Four 30–minutes exposure for 1 week           | Sitting.                           | Higher motion sickness.                                                                                                               |
| Park et al. [53]      | 40, 80, 120, 150, 180, and 200 Hz.                                                                                       | 45 seconds.                                   | Sitting.                           | Frequencies within 100 Hz -150 Hz produced higher TVR, which is responsible for higher muscle stress and fatigue.                     |
| Hansson et al. [46]   | 5 Hz.                                                                                                                    | 5 minutes/set.                                | Sitting.                           | Development of muscle fatigue.                                                                                                        |
| Landstrom et al. [91] | 3 Hz (sinusoidal and longitudinal), 2 Hz – 20 Hz (random and longitudinal vibration, acceleration 0.3 m/s <sup>2</sup> . | 15 minutes.                                   | Sitting.                           | Decrease in wakefulness.                                                                                                              |
