# Supplementary material for: On the Optimal Whole-Body Vibration Protocol for Muscle Strength
Source: MDPI journal article supplement (doi:10.3390/biomechanics2040043), 2022-10-19
Supplement: s1 [file s1]

Archive with 1 entries (1 files):
- biomechanics-1884118-supplementary.pdf
